# Supplementary material for: Synthesis, characterization and cytotoxic activity studies on cancer cell lines of new paraben-decorated monospiro-cyclotriphosphazenes
Source: Royal Society of Chemistry journal article supplement (doi:10.1039/d1nj04585g), 2021-12-27
Supplement: d1nj04585g1.pdf [file d1nj04585g1.pdf]

## SUPPORTING INFORMATION

### **Synthesis, Characterization and Cytotoxic Activity Studies on Cancer Cell Lines of New Paraben Decorated *Monospiro-* Cyclotriphosphazenes**

*Elif Şenkuytu<sup>1\*</sup>, Nadide Akbaş<sup>1</sup>, Tuba Yıldırım<sup>2</sup> and Gönül Yenilmez Çiftçi<sup>1</sup>*

<sup>1</sup> Department of Chemistry, Faculty of Science, Atatürk University, 25100, Erzurum, Turkey

<sup>2</sup>Department of Chemistry, Gebze Technical University, 41400, Gebze/Kocaeli, Turkey

<sup>3</sup>Department of Biology, Faculty of Arts and Sciences, Amasya University, 05100 Amasya, Turkey

## TABLE OF CONTENTS

|                                                                                                                                                                                            |    |
|--------------------------------------------------------------------------------------------------------------------------------------------------------------------------------------------|----|
| <b>Figure S1.</b> Mass spectrum of compound <b>1</b> .....                                                                                                                                 | 2  |
| <b>Figure S2.</b> The proton decoupled $^{31}\text{P}$ NMR spectrum of compound <b>1</b> .....                                                                                             | 2  |
| <b>Figure S3.</b> $^1\text{H}$ NMR spectrum of compound <b>1</b> .....                                                                                                                     | 3  |
| <b>Figure S4.</b> $^{13}\text{C}$ NMR spectrum of compound <b>1</b> .....                                                                                                                  | 3  |
| <b>Figure S5.</b> FT-IR spectrum of compound <b>1</b> .....                                                                                                                                | 4  |
| <b>Figure S6.</b> Mass spectrum of compound <b>2</b> .....                                                                                                                                 | 4  |
| <b>Figure S7.</b> The proton decoupled $^{31}\text{P}$ NMR spectrum of compound <b>2</b> .....                                                                                             | 5  |
| <b>Figure S8.</b> $^1\text{H}$ NMR spectrum of compound <b>2</b> .....                                                                                                                     | 5  |
| <b>Figure S9.</b> $^{13}\text{C}$ NMR spectrum of compound <b>2</b> .....                                                                                                                  | 6  |
| <b>Figure S10.</b> FT-IR spectrum of compound <b>2</b> .....                                                                                                                               | 6  |
| <b>Figure S11.</b> Mass spectrum of compound <b>3</b> .....                                                                                                                                | 7  |
| <b>Figure S12.</b> The proton decoupled $^{31}\text{P}$ NMR spectrum of compound <b>3</b> .....                                                                                            | 7  |
| <b>Figure S13.</b> $^1\text{H}$ NMR spectrum of compound <b>3</b> .....                                                                                                                    | 8  |
| <b>Figure S14.</b> $^{13}\text{C}$ NMR spectrum of compound <b>3</b> .....                                                                                                                 | 8  |
| <b>Figure S15.</b> FT-IR spectrum of compound <b>3</b> .....                                                                                                                               | 9  |
| <b>Figure S16.</b> Mass spectrum of compound <b>4</b> .....                                                                                                                                | 9  |
| <b>Figure S17.</b> The proton decoupled $^{31}\text{P}$ NMR spectrum of compound <b>4</b> .....                                                                                            | 10 |
| <b>Figure S18.</b> $^1\text{H}$ NMR spectrum of compound <b>4</b> .....                                                                                                                    | 10 |
| <b>Figure S19.</b> $^{13}\text{C}$ NMR spectrum of compound <b>4</b> .....                                                                                                                 | 11 |
| <b>Figure S20.</b> FT-IR spectrum of compound <b>4</b> .....                                                                                                                               | 11 |
| <b>Figure S21.</b> Mass spectrum of compound <b>5</b> .....                                                                                                                                | 12 |
| <b>Figure S22.</b> The proton decoupled $^{31}\text{P}$ NMR spectrum of compound <b>5</b> .....                                                                                            | 12 |
| <b>Figure S23.</b> $^1\text{H}$ NMR spectrum of compound <b>5</b> .....                                                                                                                    | 13 |
| <b>Figure S24.</b> $^{13}\text{C}$ NMR spectrum of compound <b>5</b> .....                                                                                                                 | 13 |
| <b>Figure S25.</b> FT-IR spectrum of compound <b>5</b> .....                                                                                                                               | 14 |
| <b>Figure S26.</b> Mass spectrum of compound <b>6</b> .....                                                                                                                                | 14 |
| <b>Figure S27.</b> The proton decoupled $^{31}\text{P}$ NMR spectrum of compound <b>6</b> .....                                                                                            | 15 |
| <b>Figure S28.</b> $^1\text{H}$ NMR spectrum of compound <b>6</b> .....                                                                                                                    | 15 |
| <b>Figure S29.</b> $^{13}\text{C}$ NMR spectrum of compound <b>6</b> .....                                                                                                                 | 16 |
| <b>Figure S30.</b> FT-IR spectrum of compound <b>6</b> .....                                                                                                                               | 16 |
| <b>Figure S31.</b> Perspective view of crystal packing of compound <b>2</b> .....                                                                                                          | 17 |
| <b>Table S1.</b> The bond and conformational parameters for compounds <b>2</b> .....                                                                                                       | 17 |
| <b>Table S2.</b> Predicted Log $\text{IC}_{50}$ ( $\mu\text{M}$ ) and calculated Log $\text{IC}_{50}$ ( $\mu\text{M}$ ) value of Compounds <b>1-6</b> for MCF-7 and DLD-1 cell lines ..... | 19 |

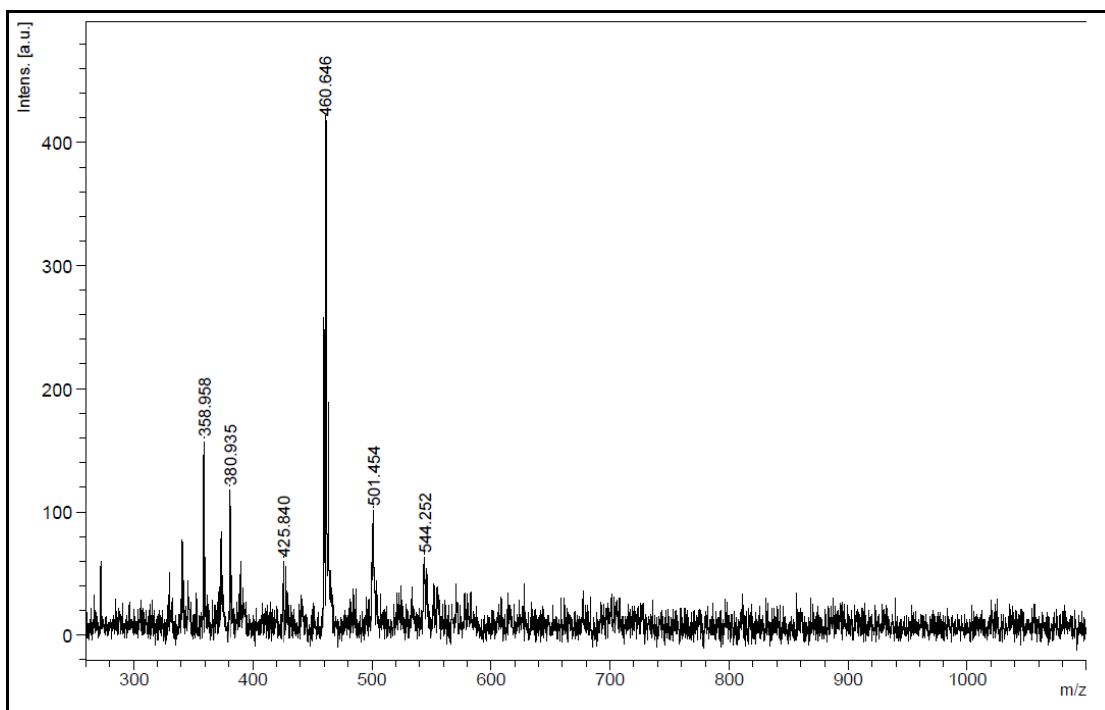

**Figure S1.** Mass spectrum of compound **1**

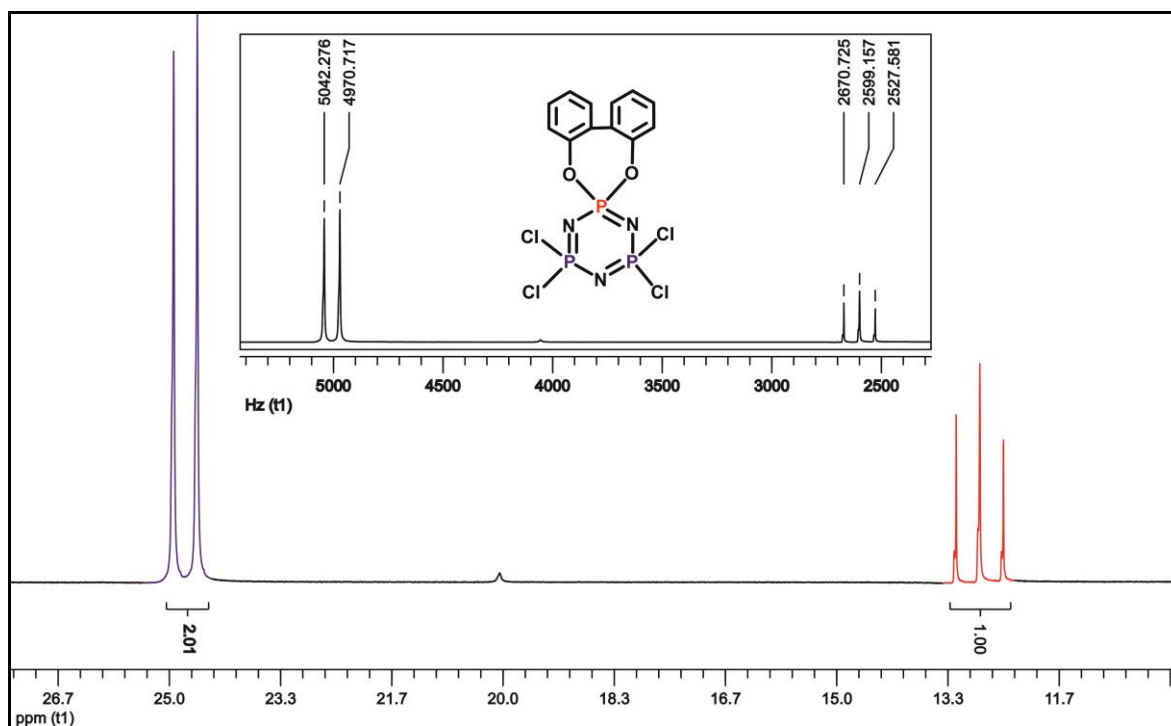

**Figure S2.** The proton decoupled  $^{31}\text{P}$  NMR spectrum of compound **1**

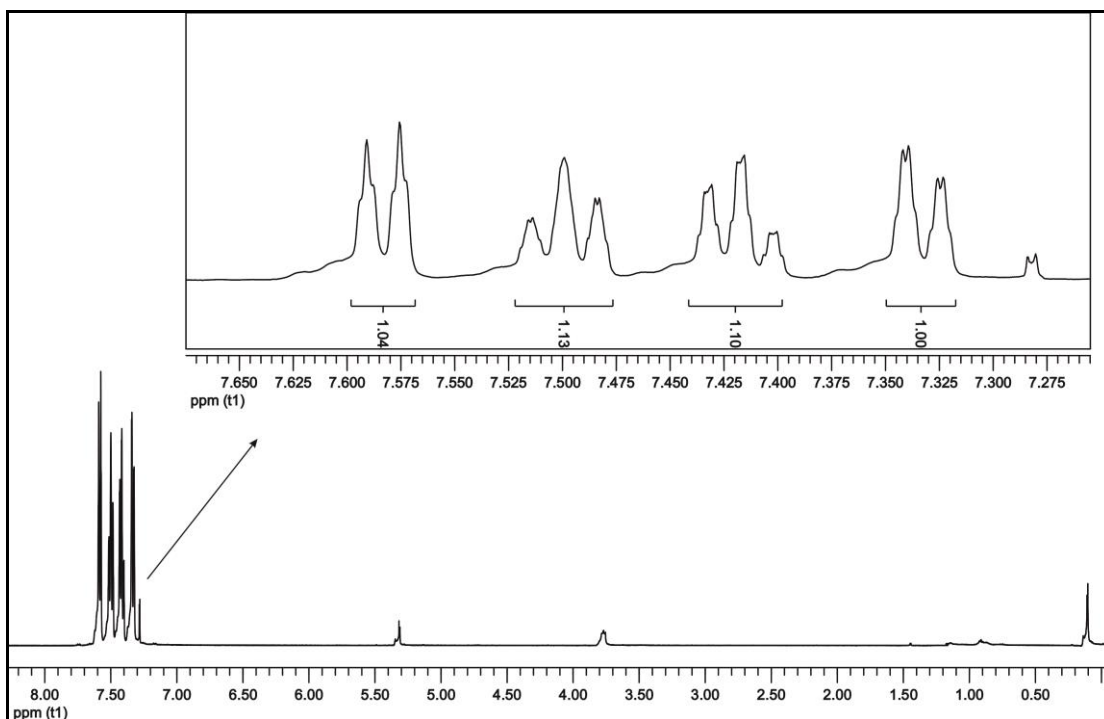

**Figure S3.**  $^1\text{H}$  NMR spectrum of compound 1

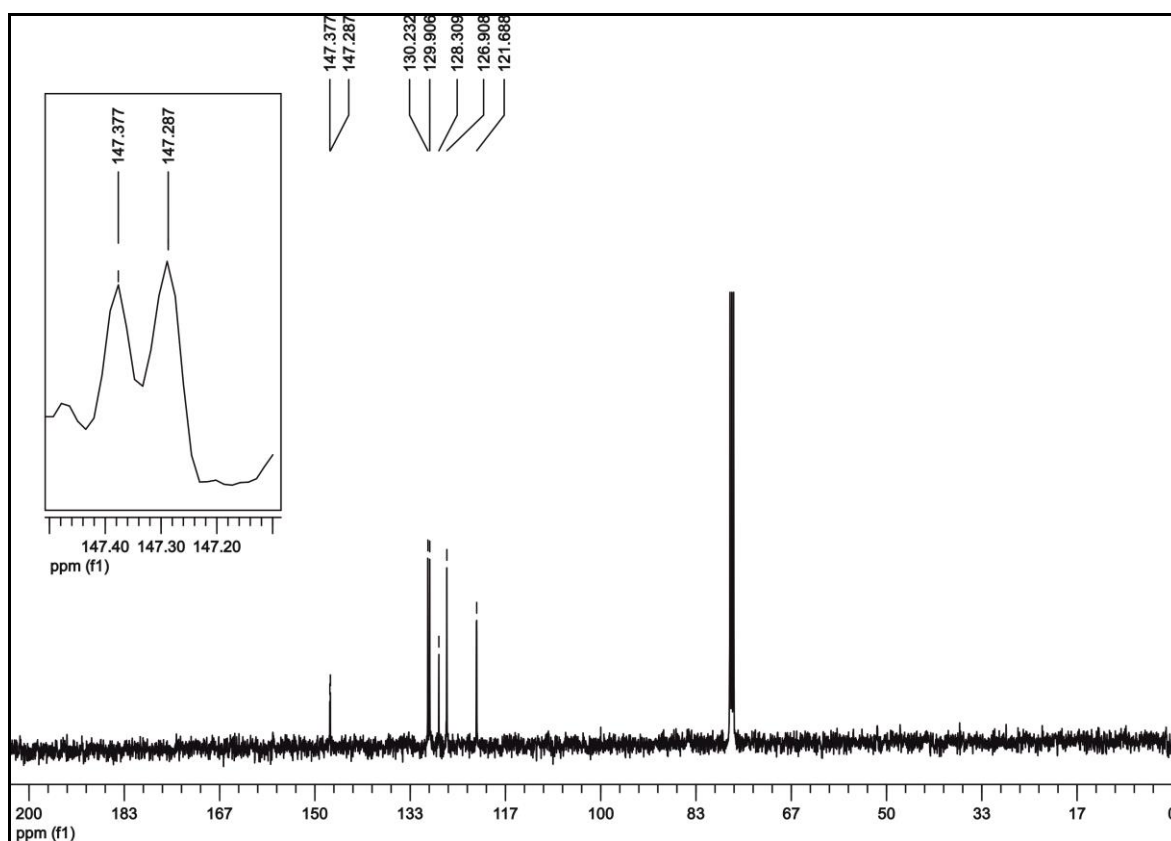

**Figure S4.**  $^{13}\text{C}$  NMR spectrum of compound 1

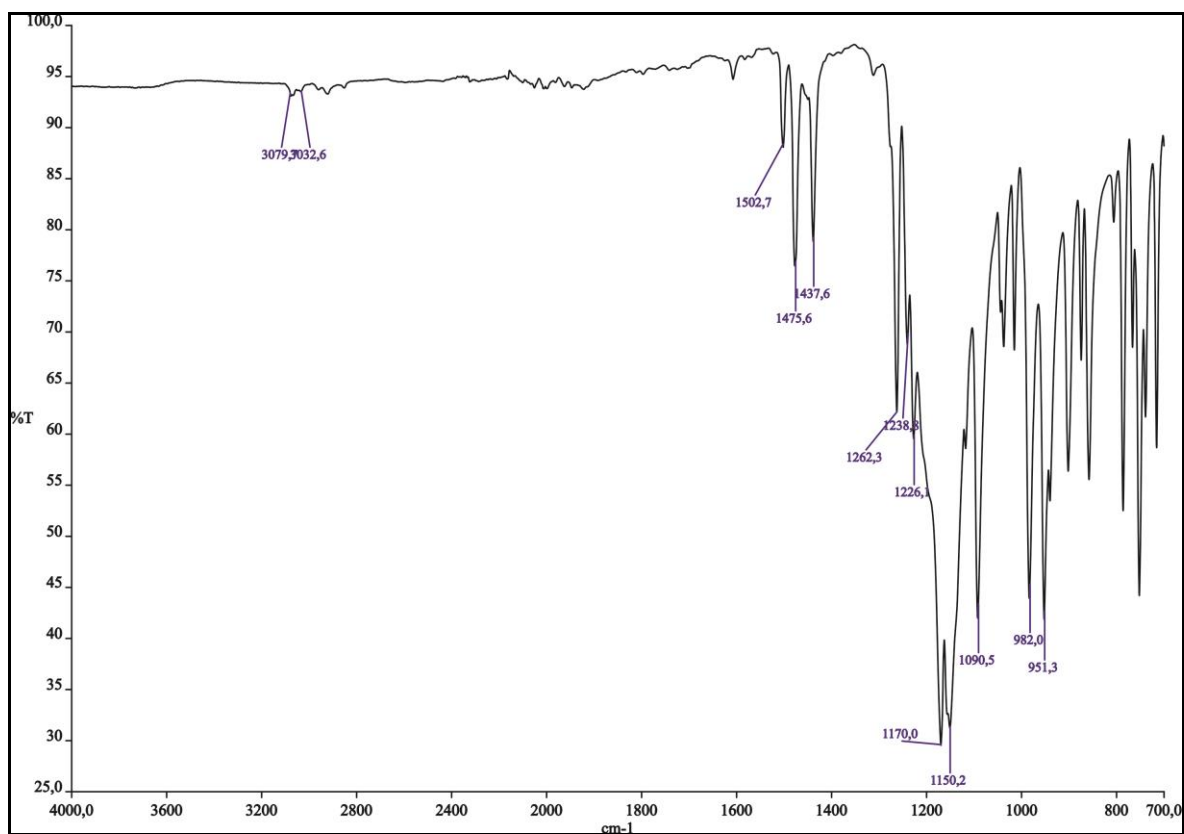

**Figure S5.** FT-IR spectrum of compound 1

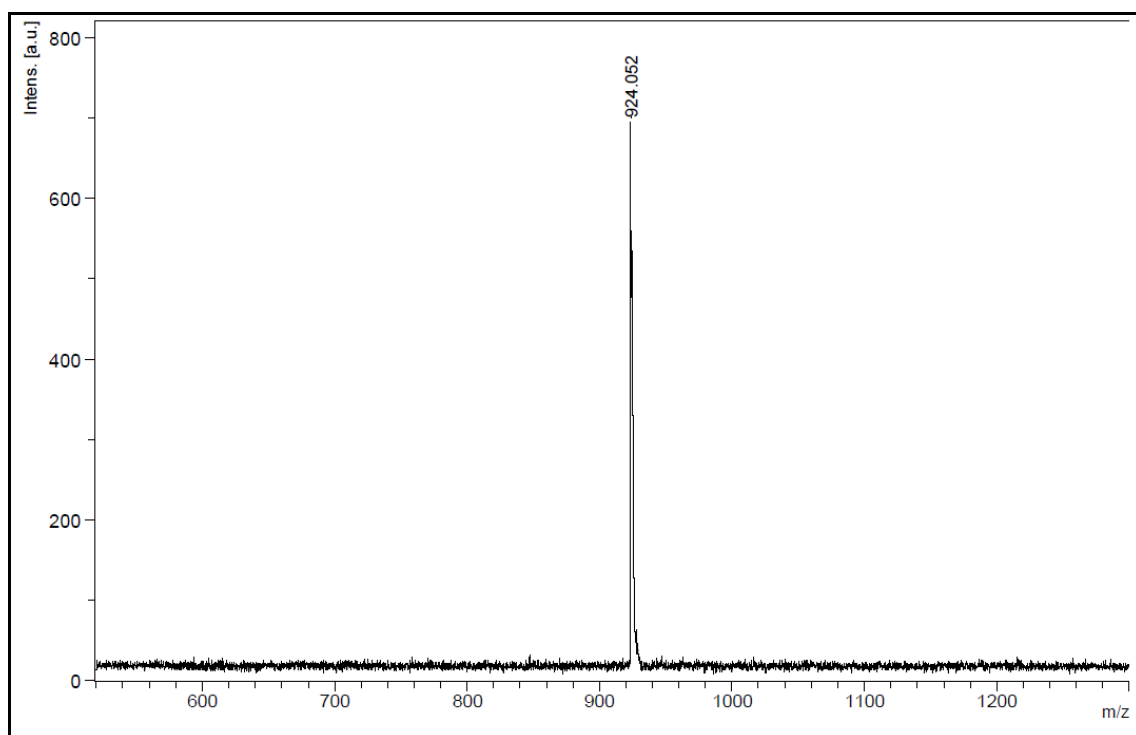

**Figure S6.** Mass spectrum of compound 2.

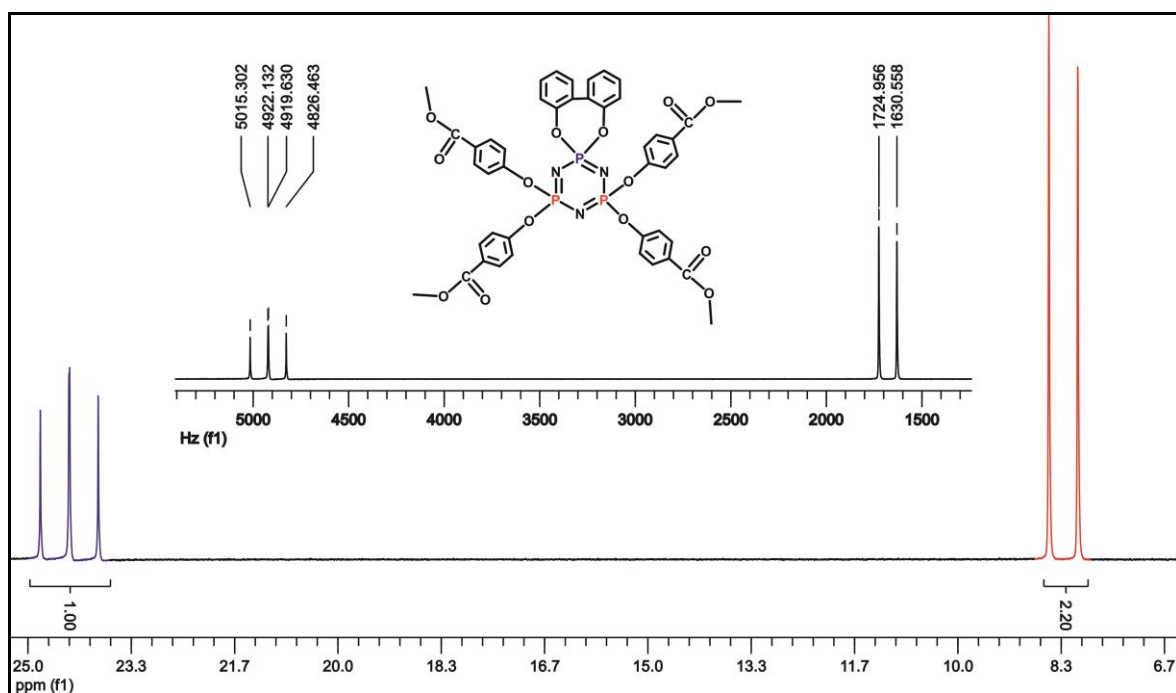

**Figure S7.** The proton decoupled  $^{31}\text{P}$  NMR spectrum of compound **2**

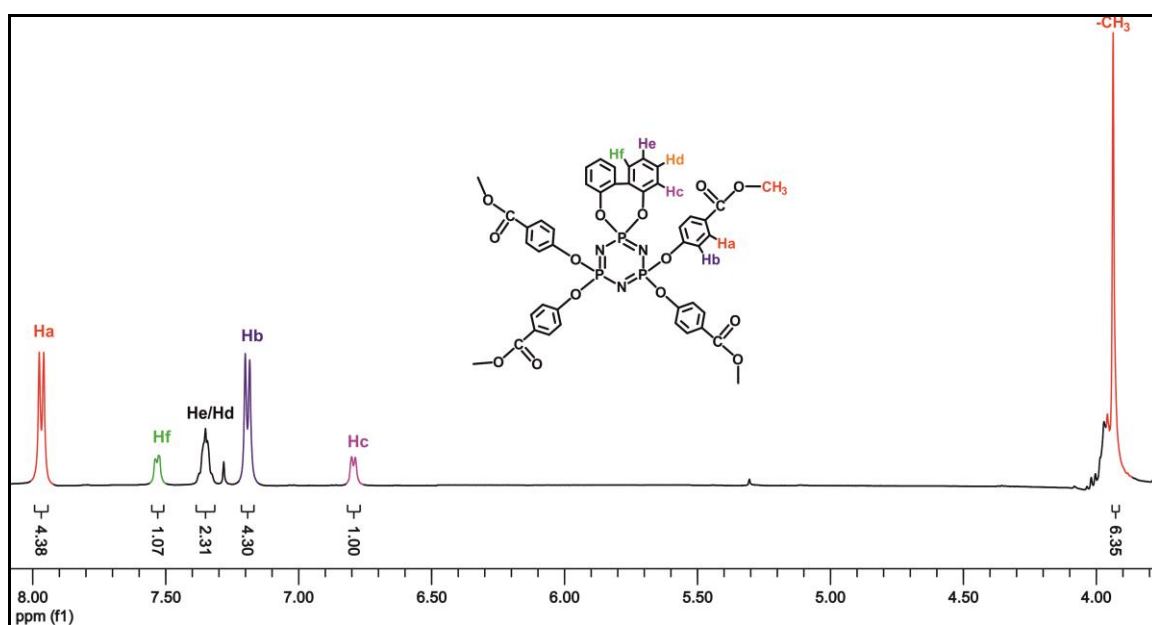

**Figure S8.**  $^1\text{H}$  NMR spectrum of compound **2**

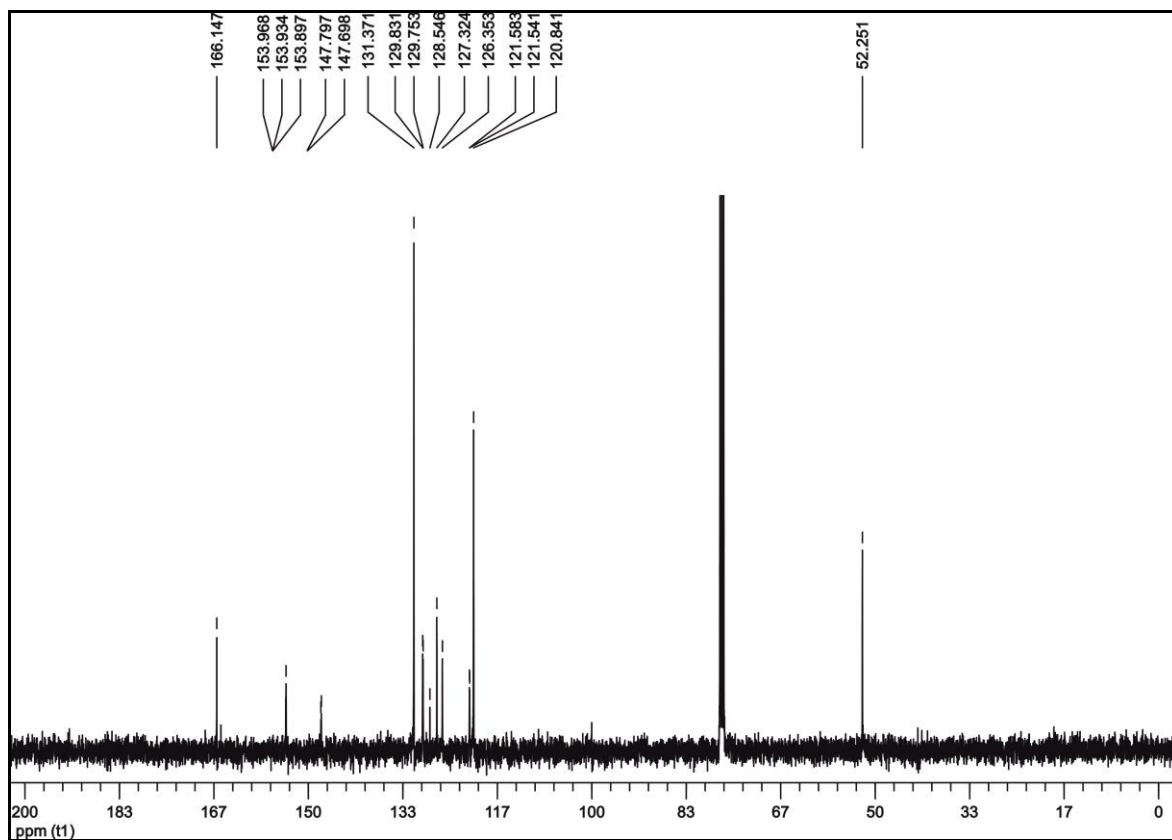

**Figure S9.**  $^{13}\text{C}$  NMR spectrum of compound **2**

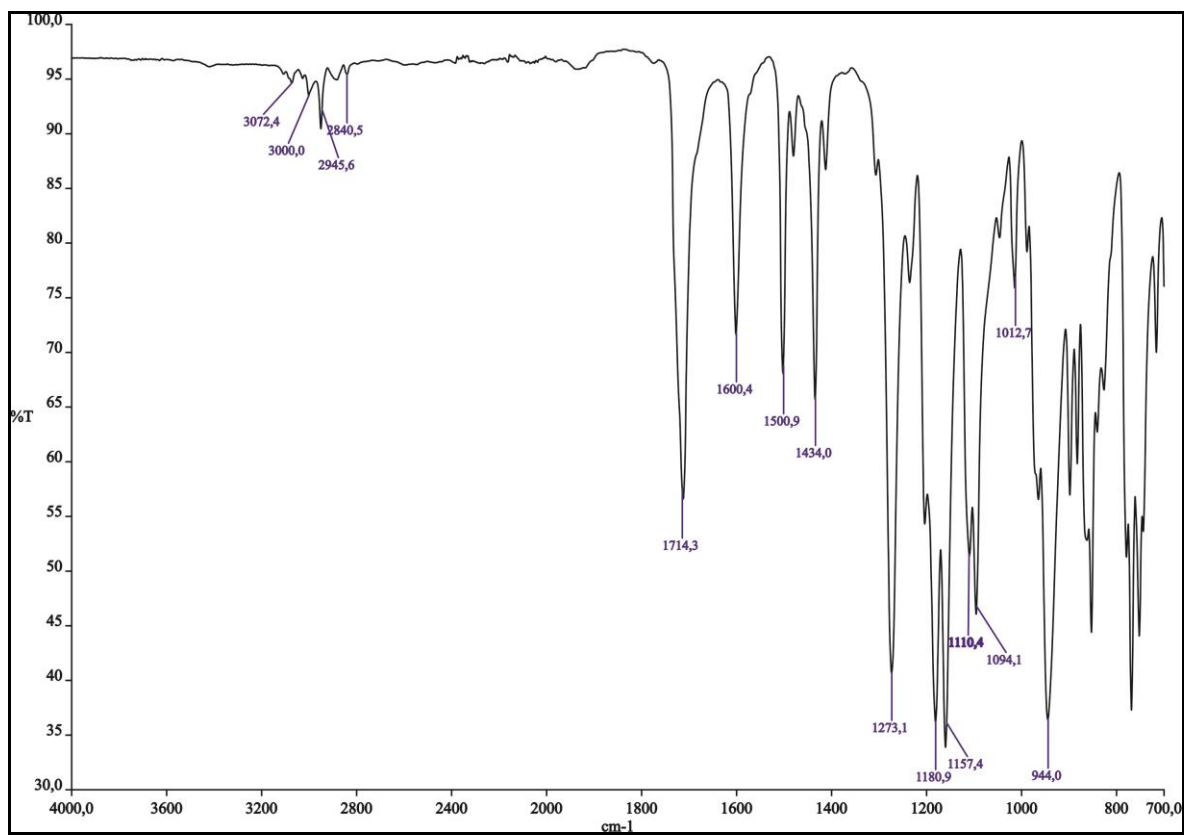

**Figure S10.** FT-IR spectrum of compound **2**

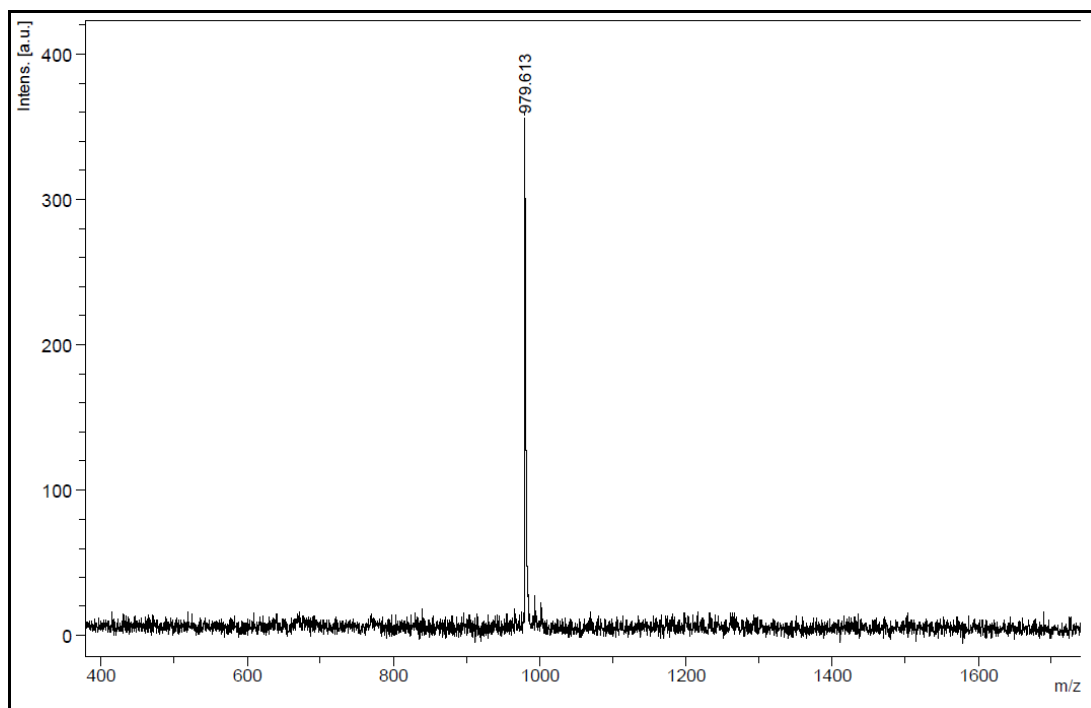

**Figure S11.** Mass spectrum of compound **3**.

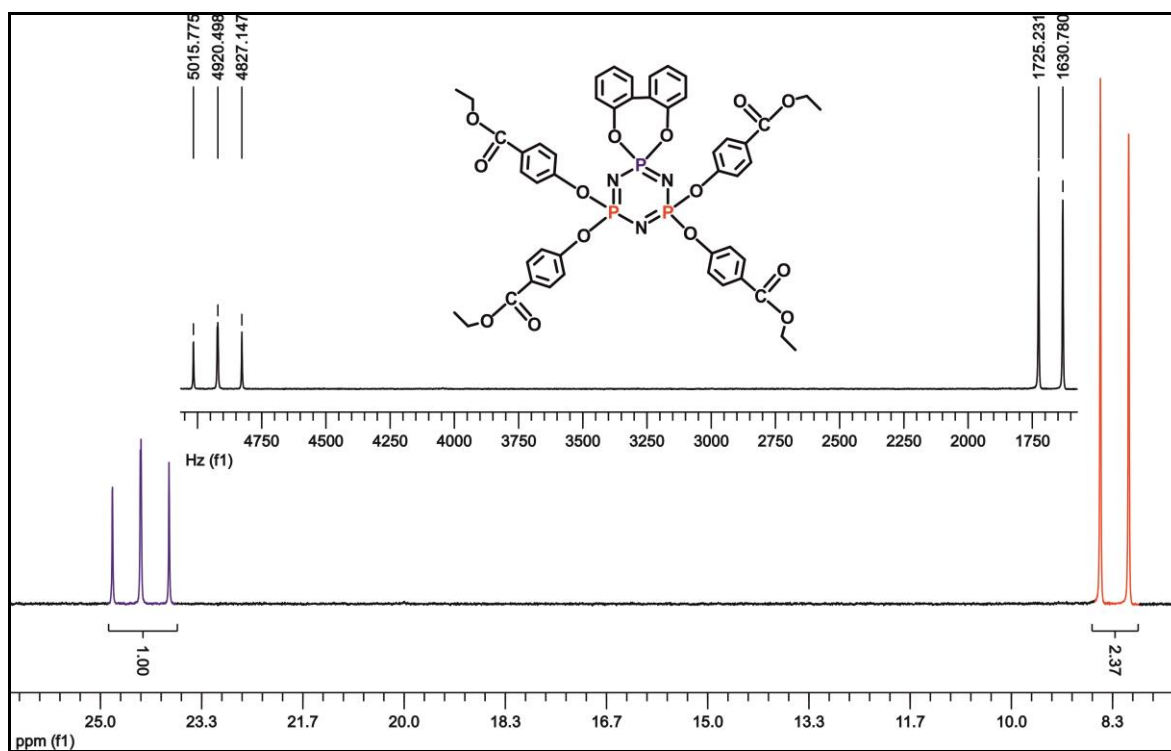

**Figure S12.** The proton decoupled  $^{31}\text{P}$  NMR spectrum of compound **3**



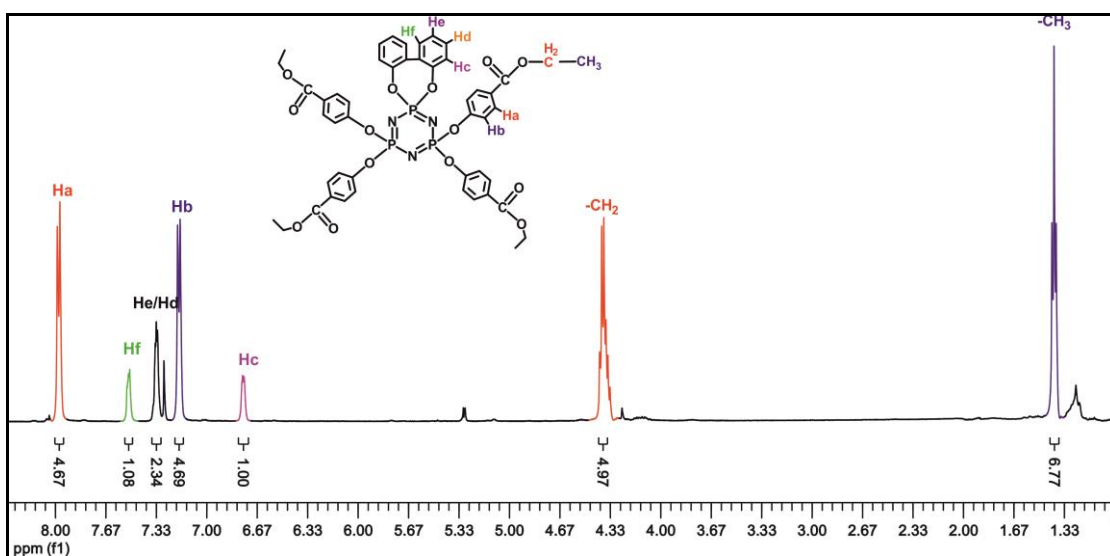

**Figure S13.**  $^1\text{H}$  NMR spectrum of compound 3

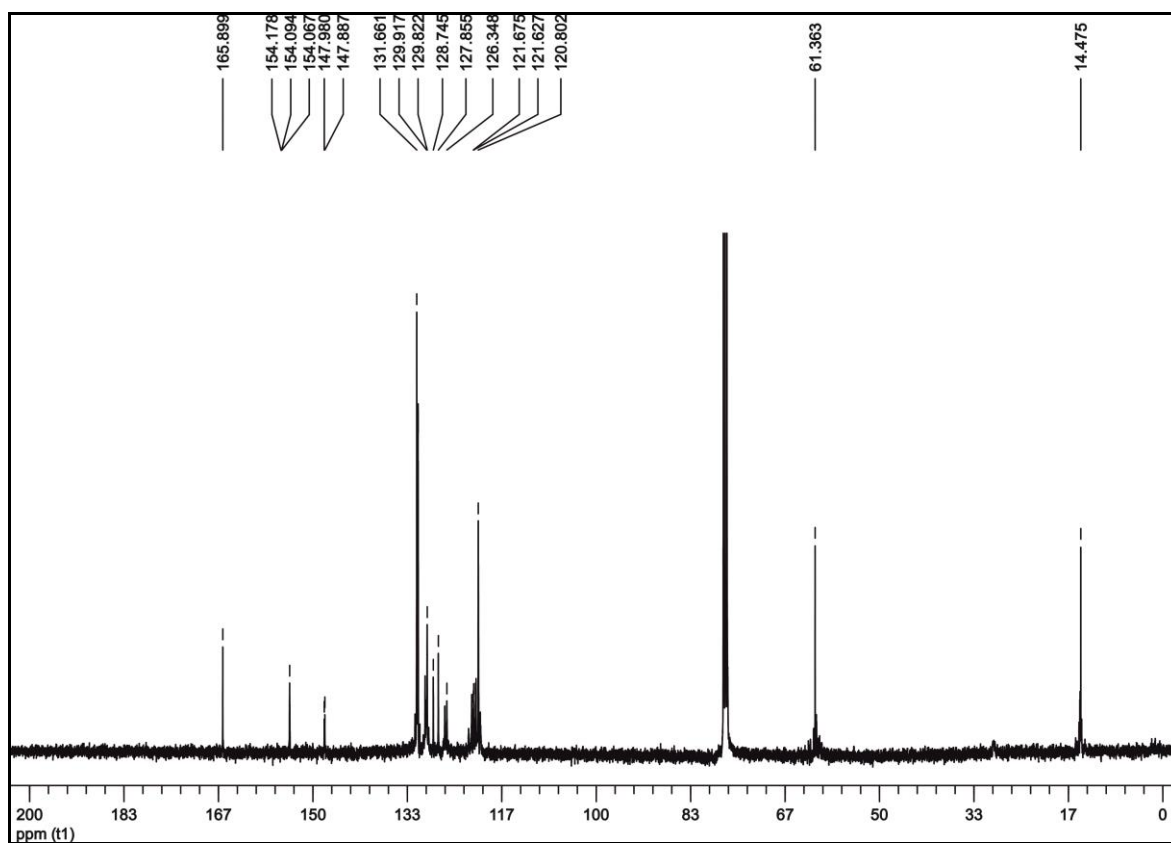

**Figure S14.**  $^{13}\text{C}$  NMR spectrum of compound 3

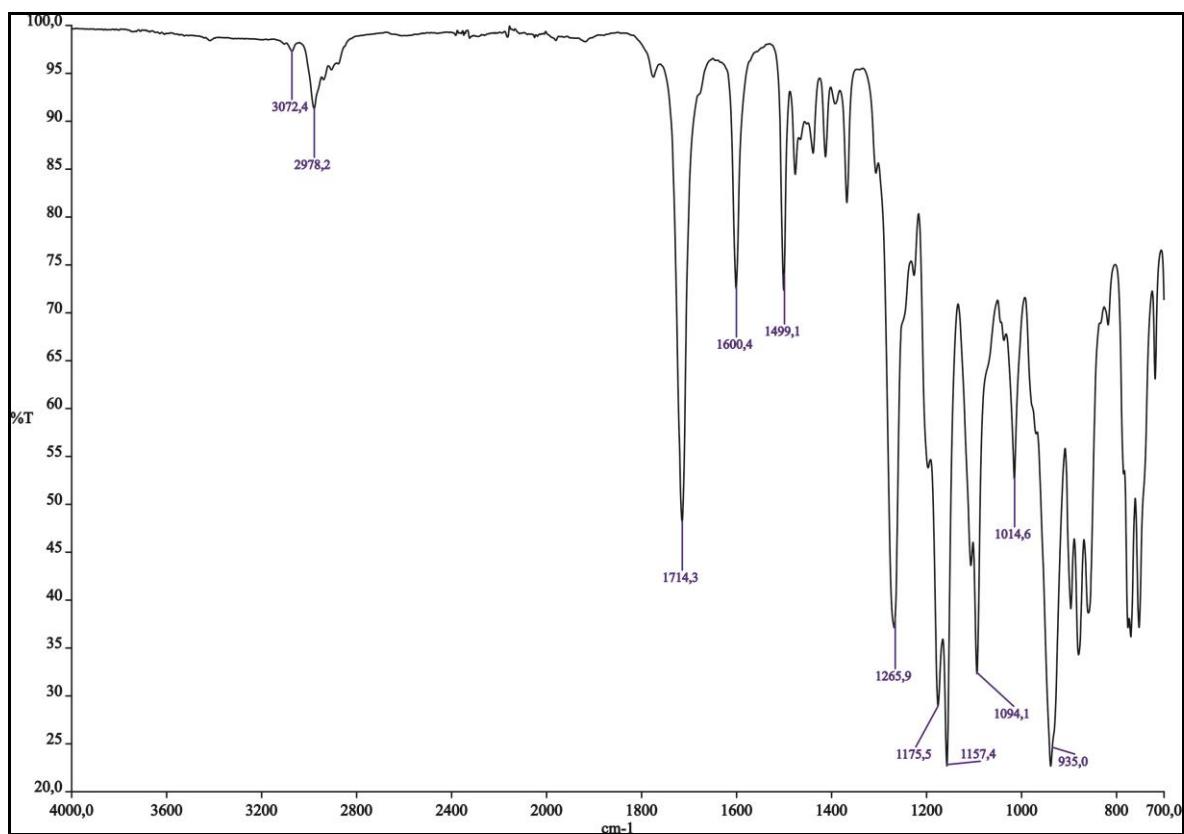

**Figure S15.** FT-IR spectrum of compound 3

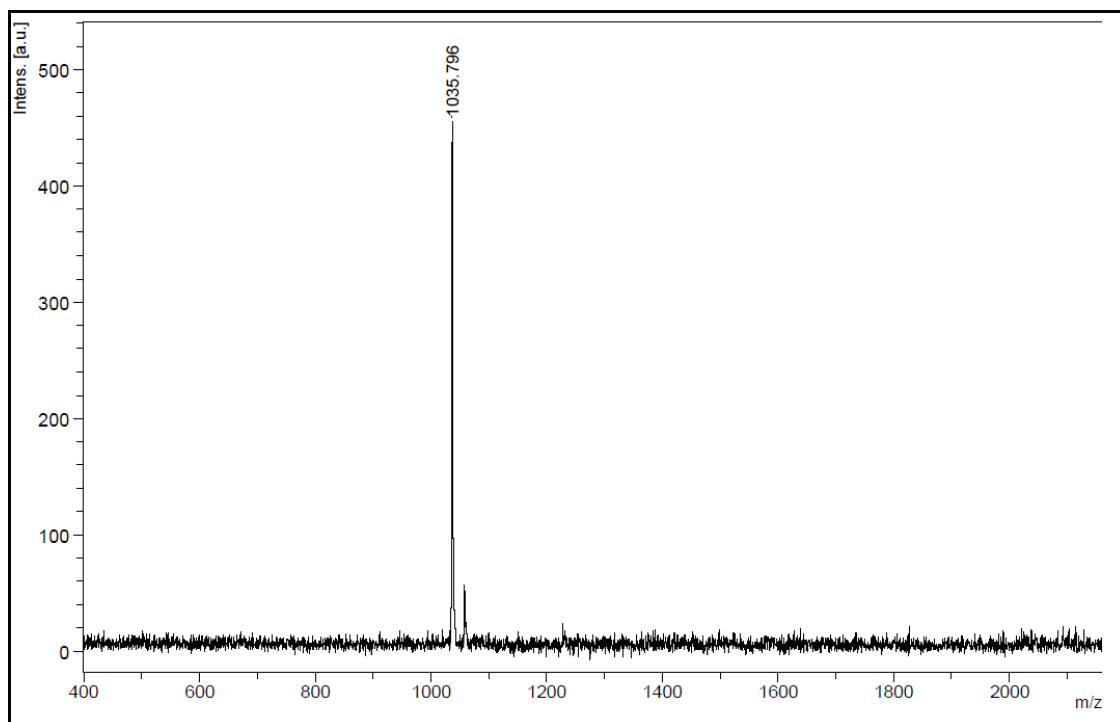

**Figure S16.** Mass spectrum of compound 4.

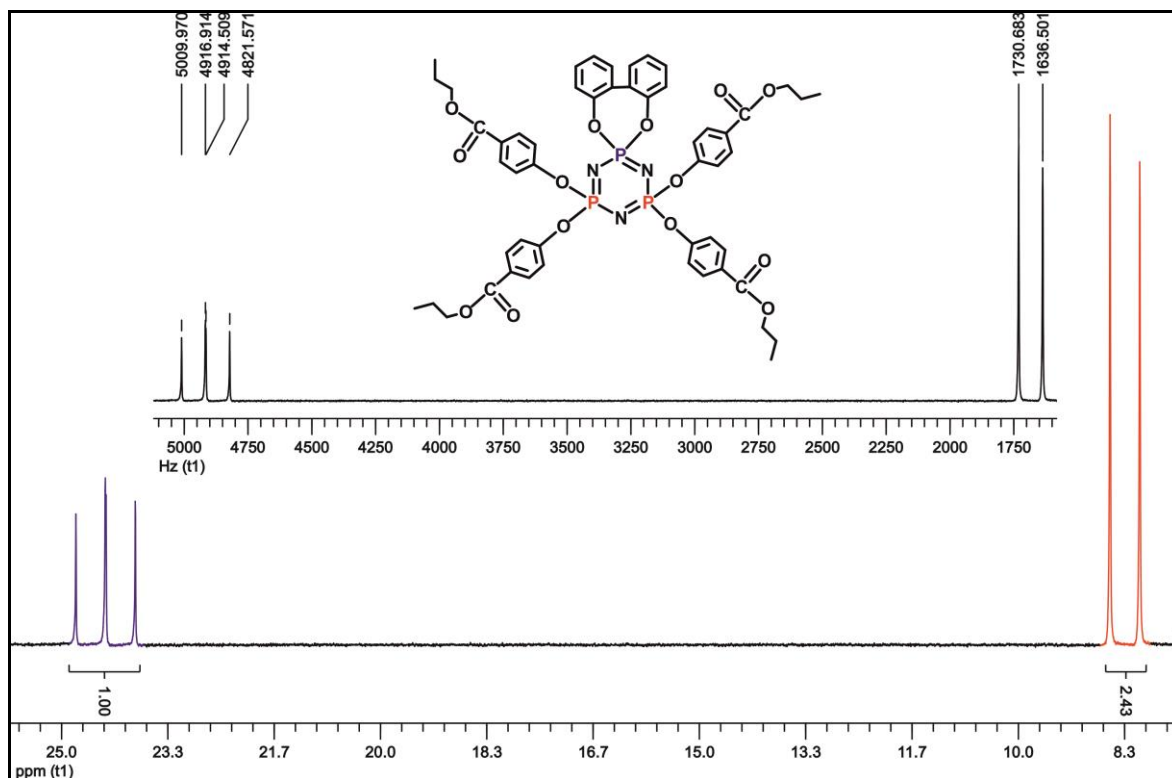

**Figure S17.** The proton decoupled  $^{31}\text{P}$  NMR spectrum of compound **4**

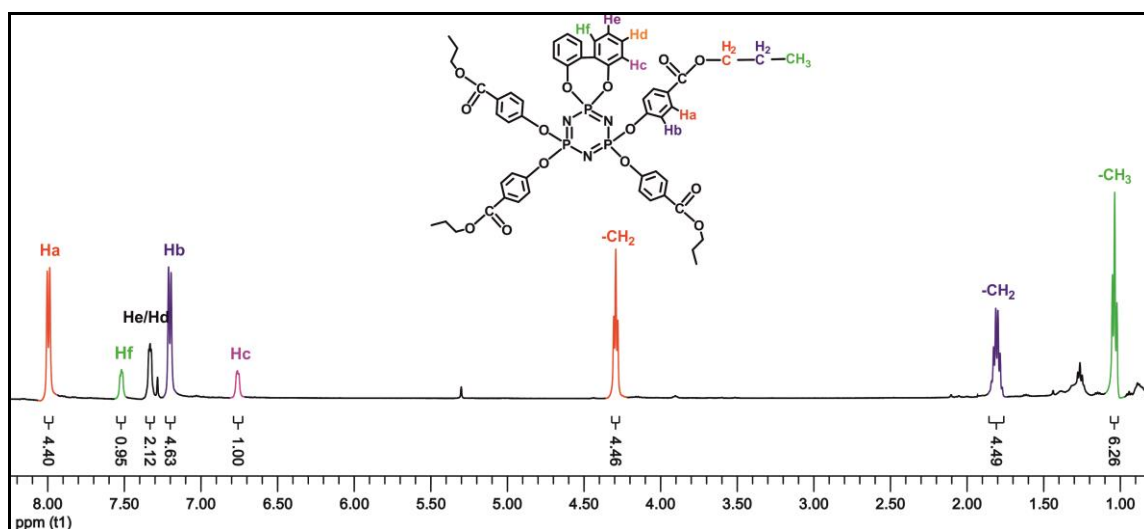

**Figure S18.**  $^1\text{H}$  NMR spectrum of compound **4**

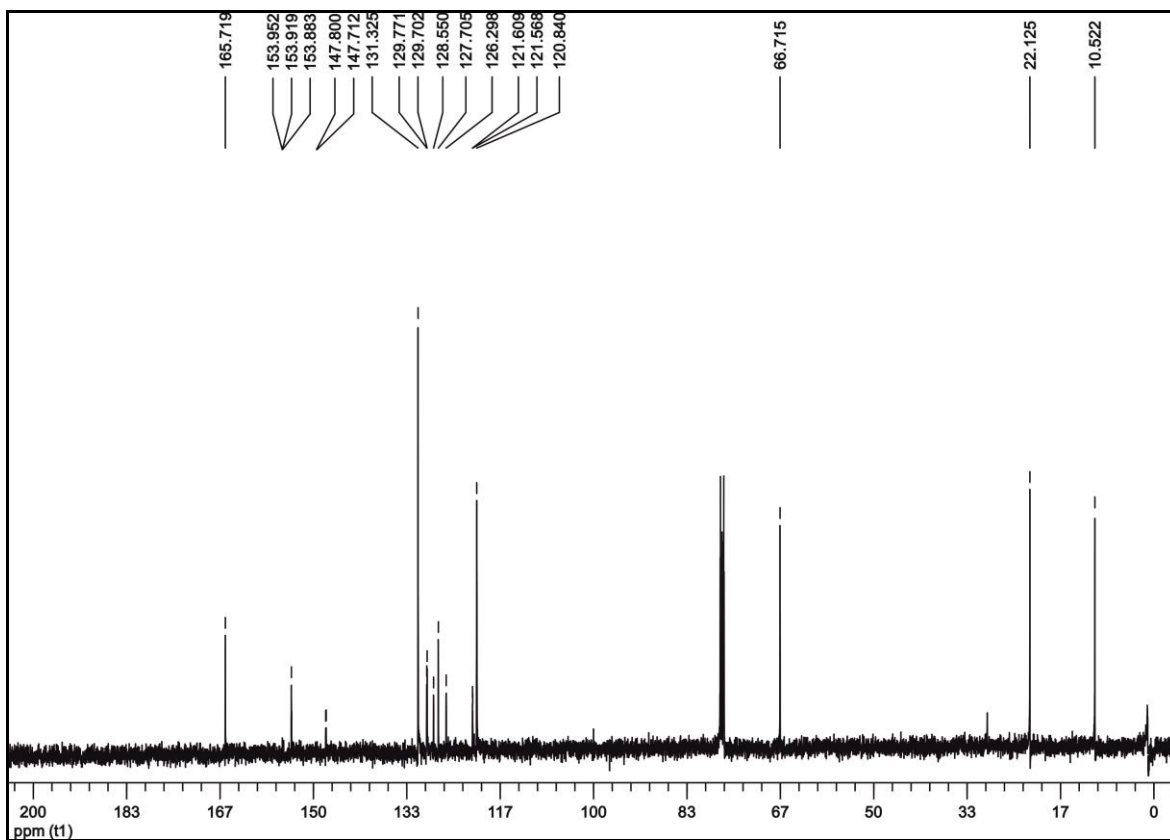

**Figure S19.**  $^{13}\text{C}$  NMR spectrum of compound **4**

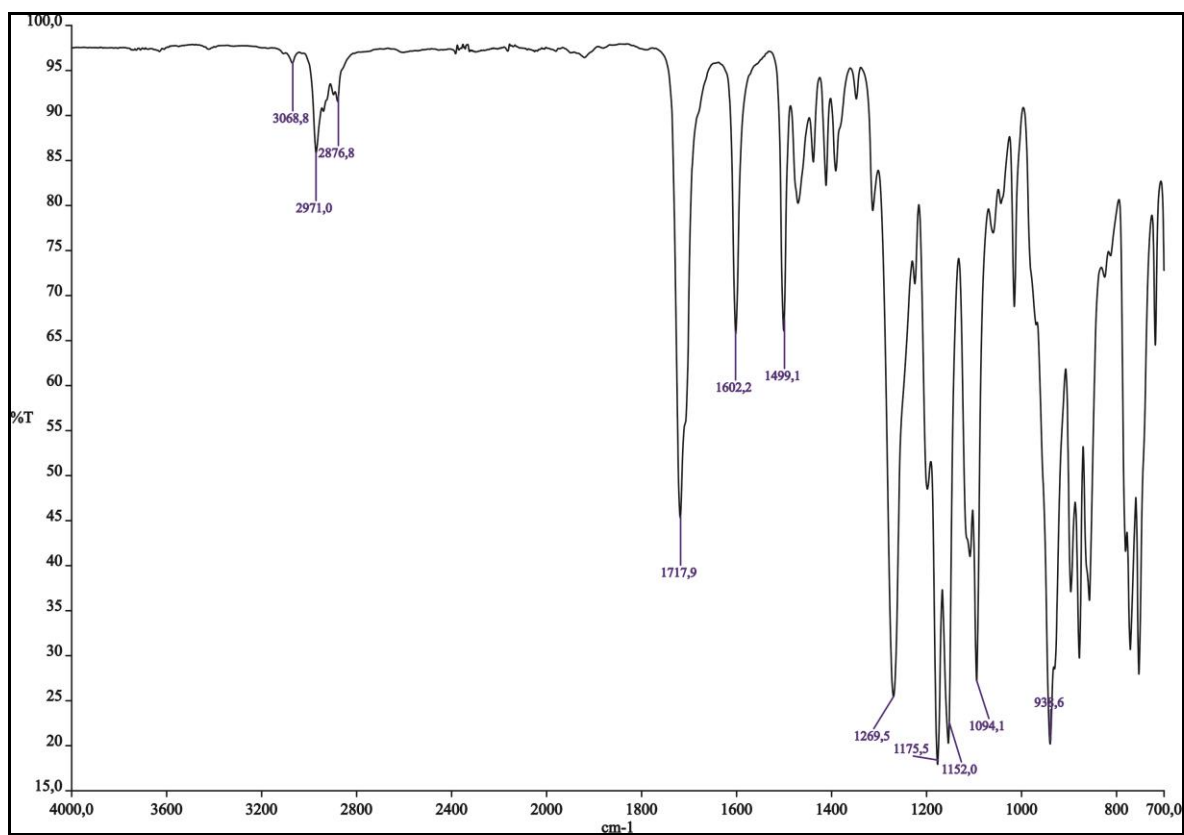

**Figure S20.** FT-IR spectrum of compound **4**

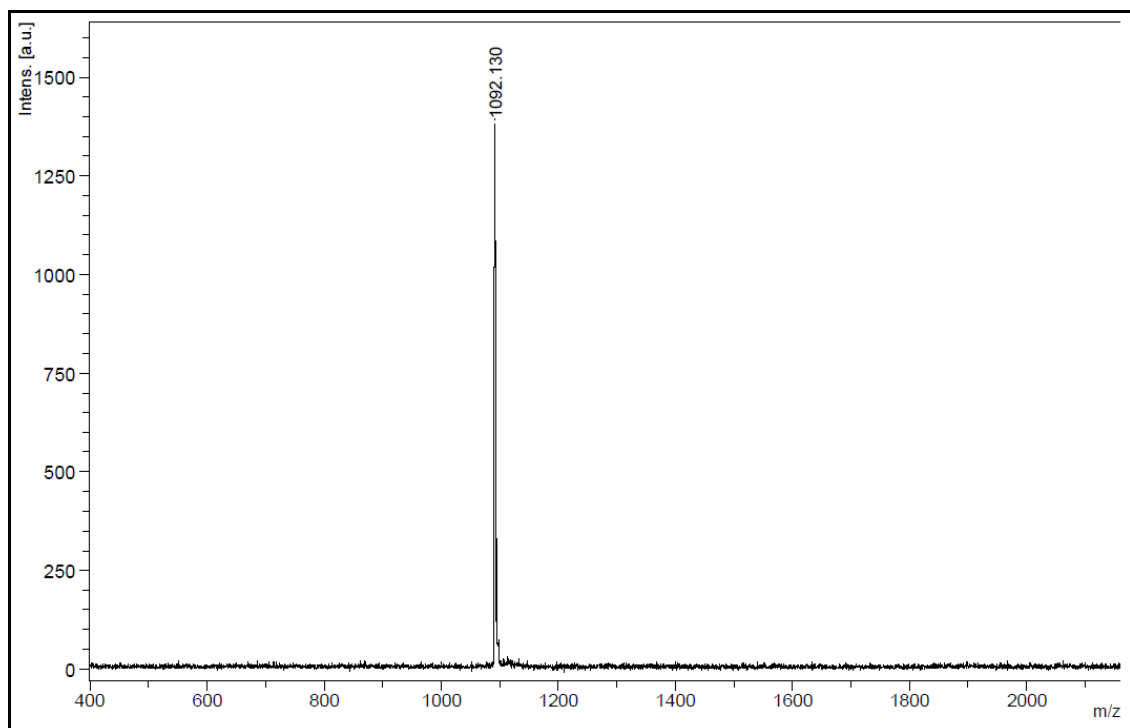

**Figure S21.** Mass spectrum of compound **5**.

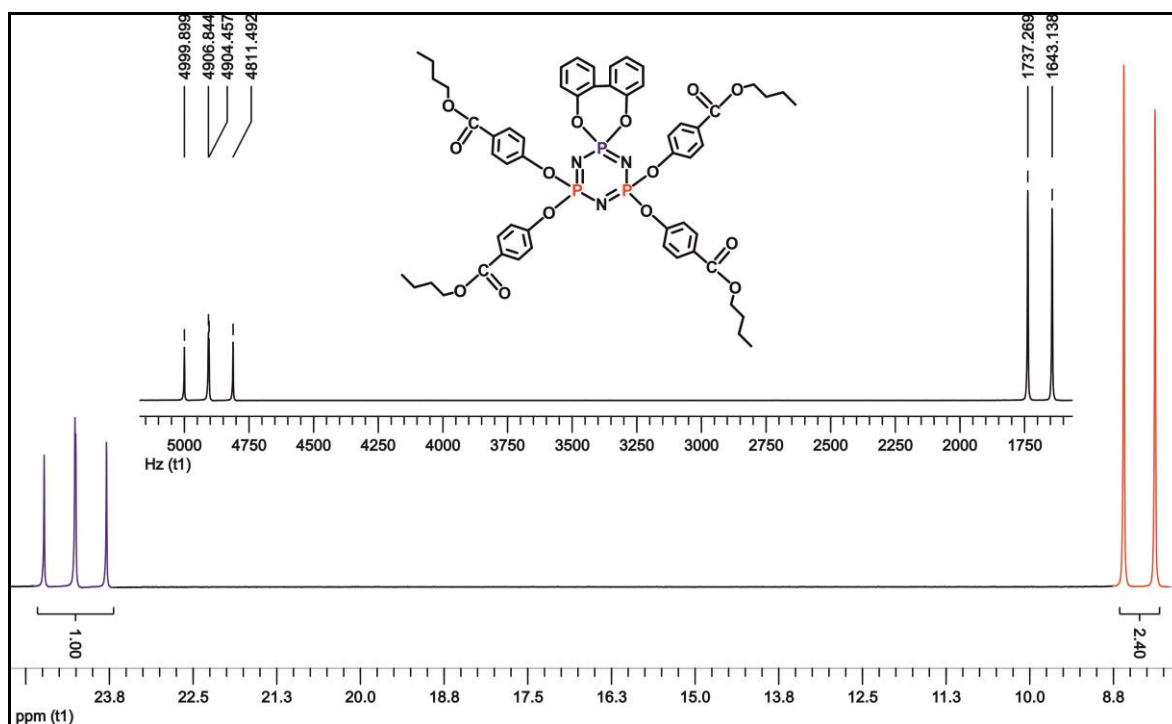

**Figure S22.** The proton decoupled  $^{31}\text{P}$  NMR spectrum of compound **5**

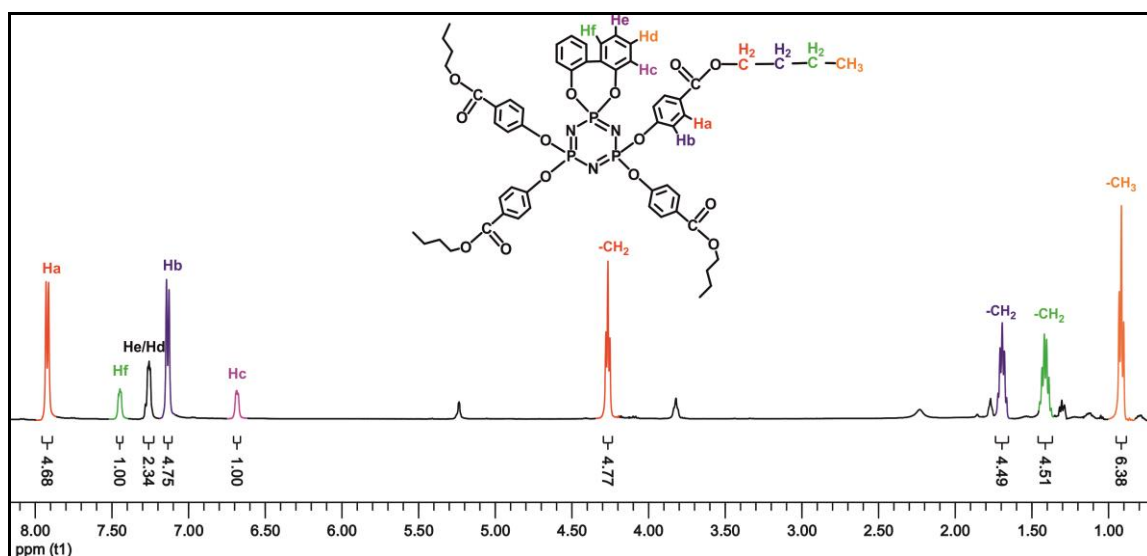

**Figure S23.** <sup>1</sup>H NMR spectrum of compound **5**

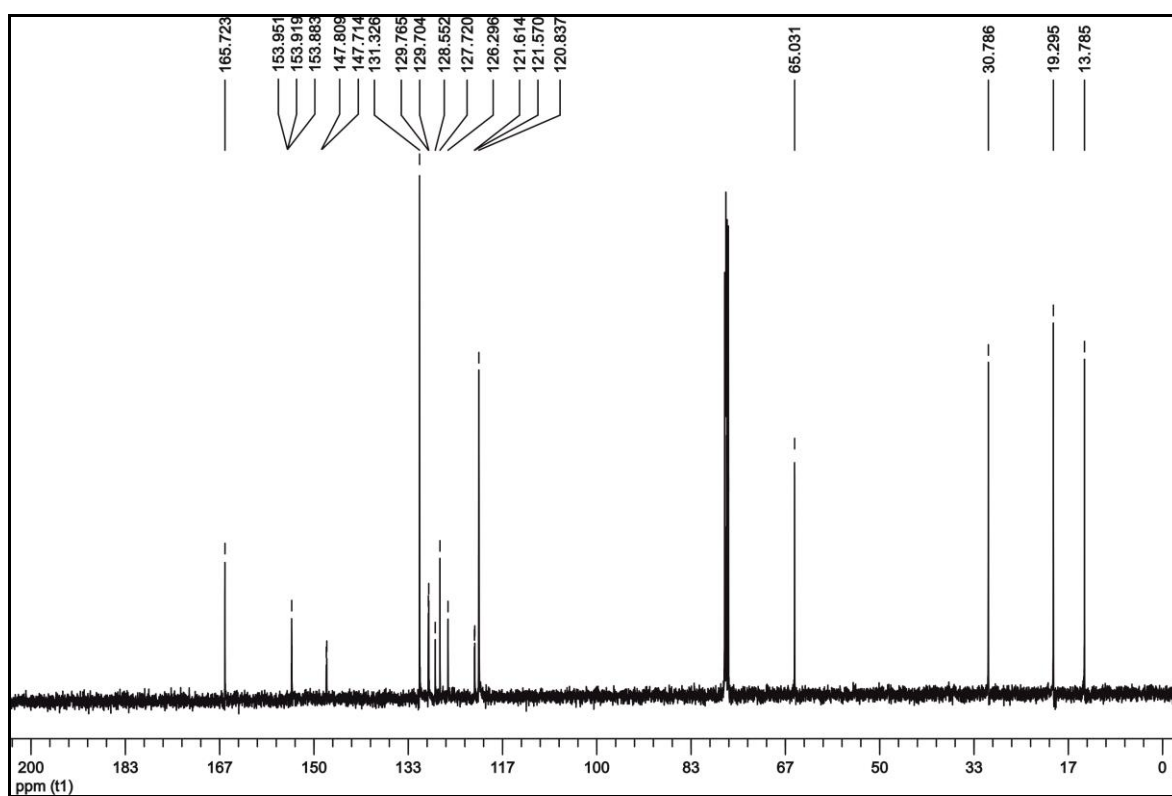

**Figure S24.** <sup>13</sup>C NMR spectrum of compound **5**

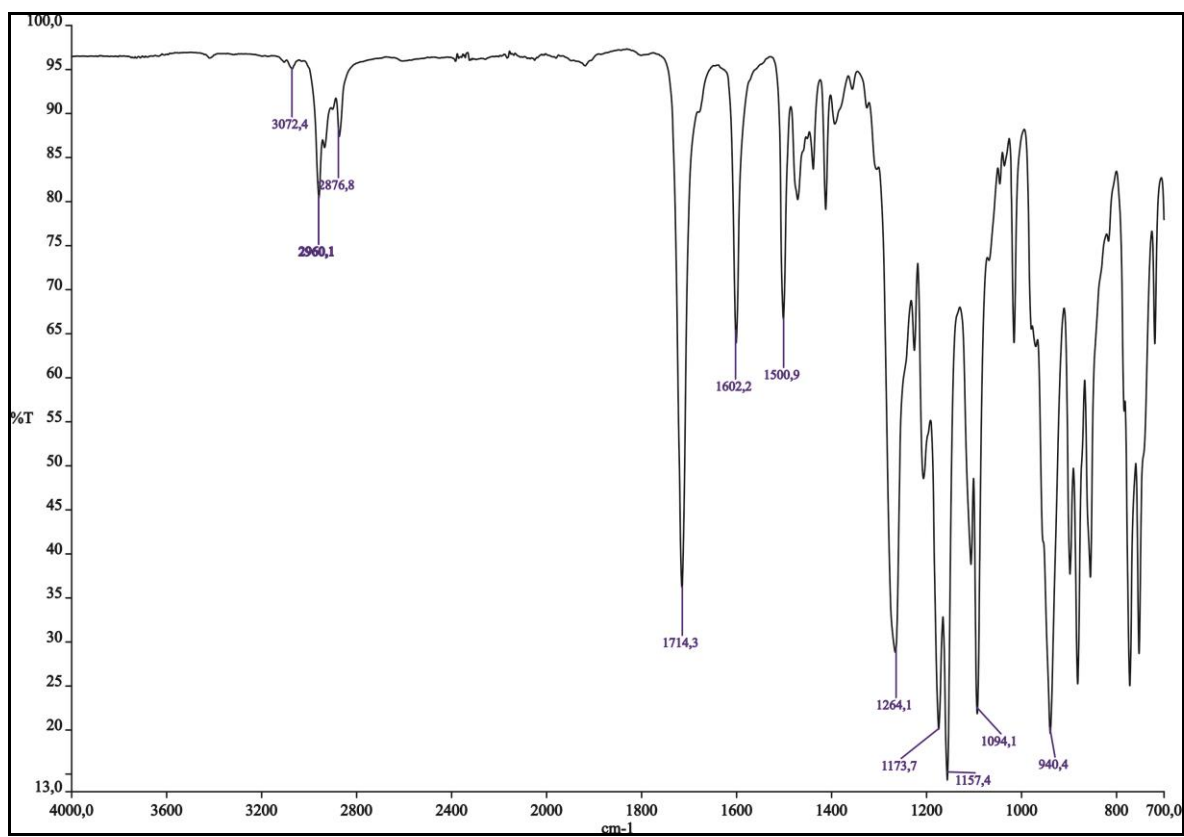

Figure S25. FT-IR spectrum of compound 5

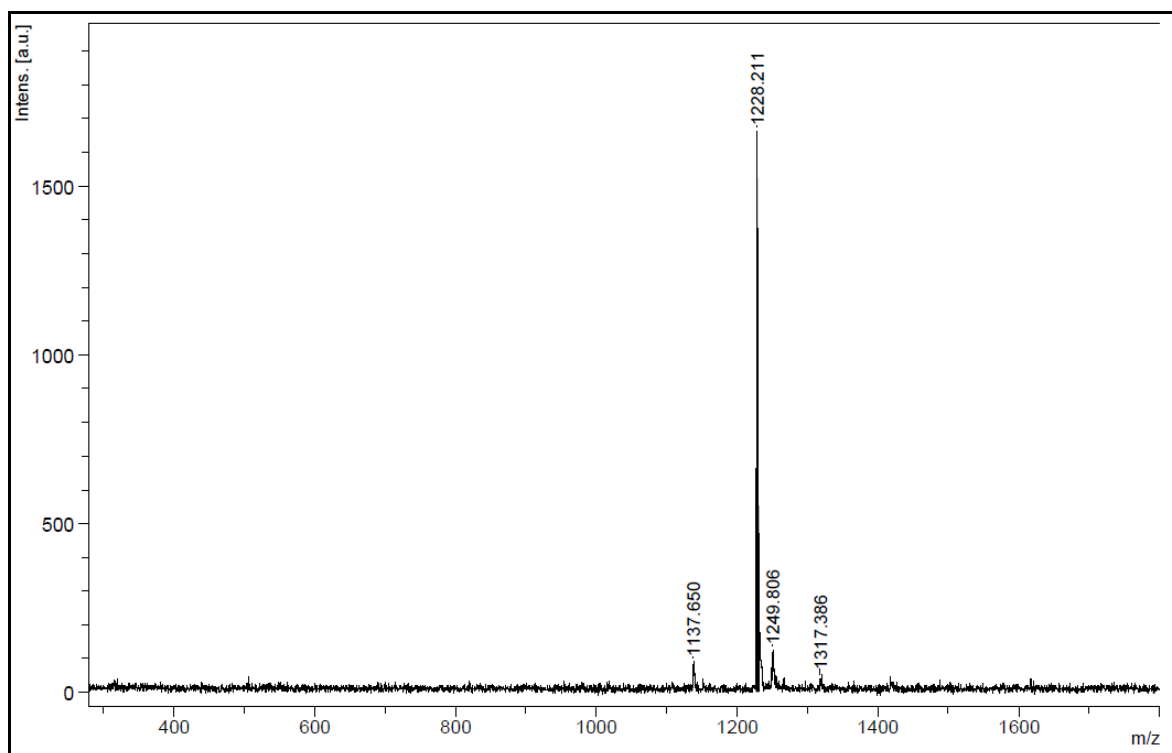

Figure S26. Mass spectrum of compound 6.

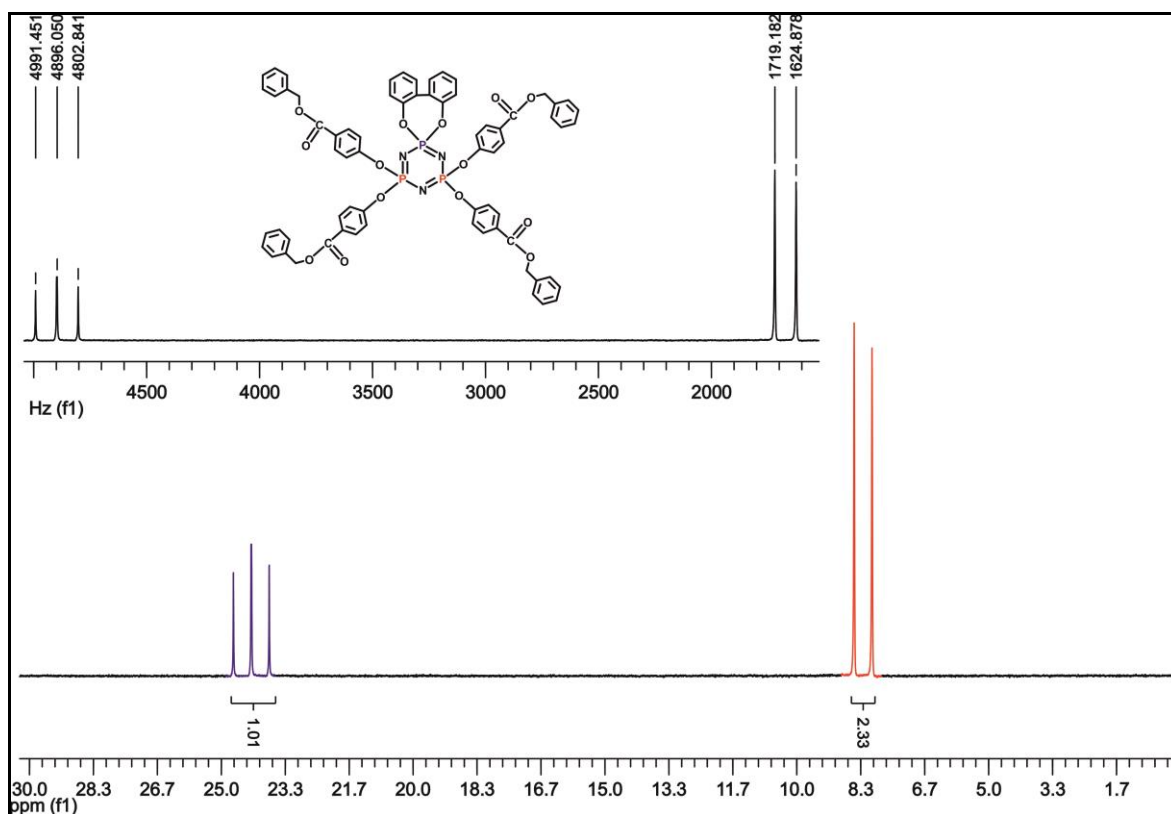

**Figure S27.** The proton decoupled  $^{31}\text{P}$  NMR spectrum of compound **6**

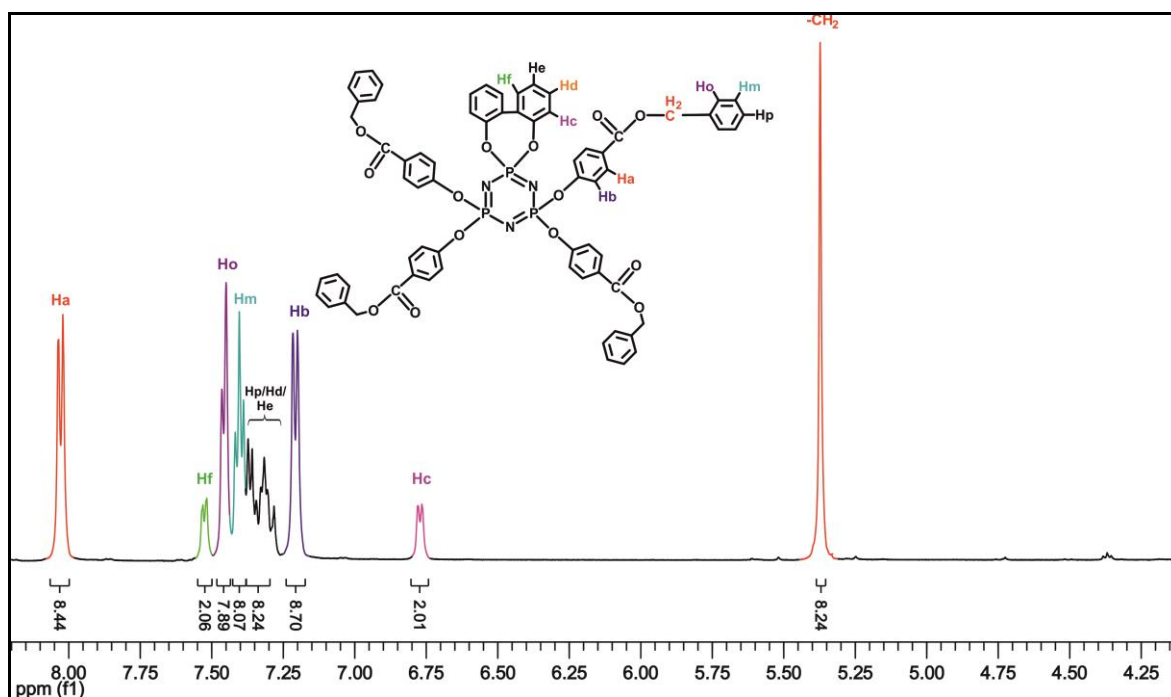

**Figure S28.**  $^1\text{H}$  NMR spectrum of compound **6**



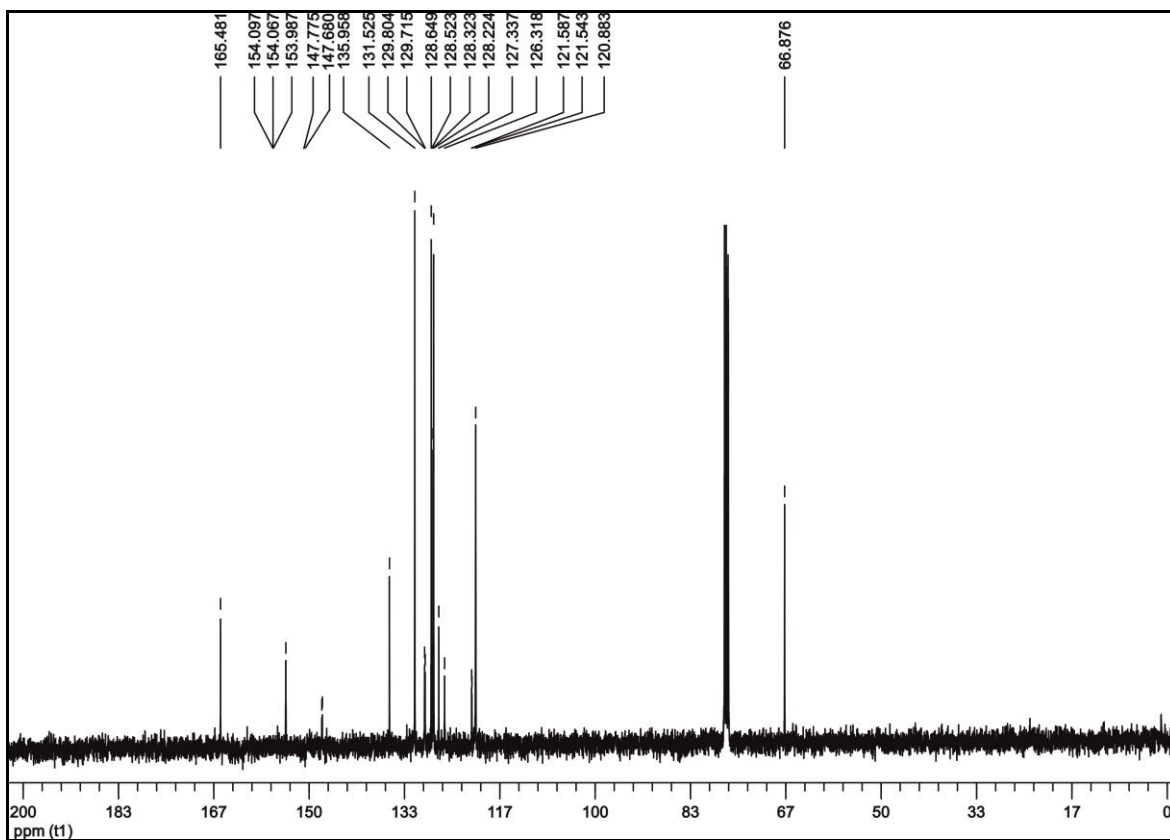

**Figure S29.**  $^{13}\text{C}$  NMR spectrum of compound 6

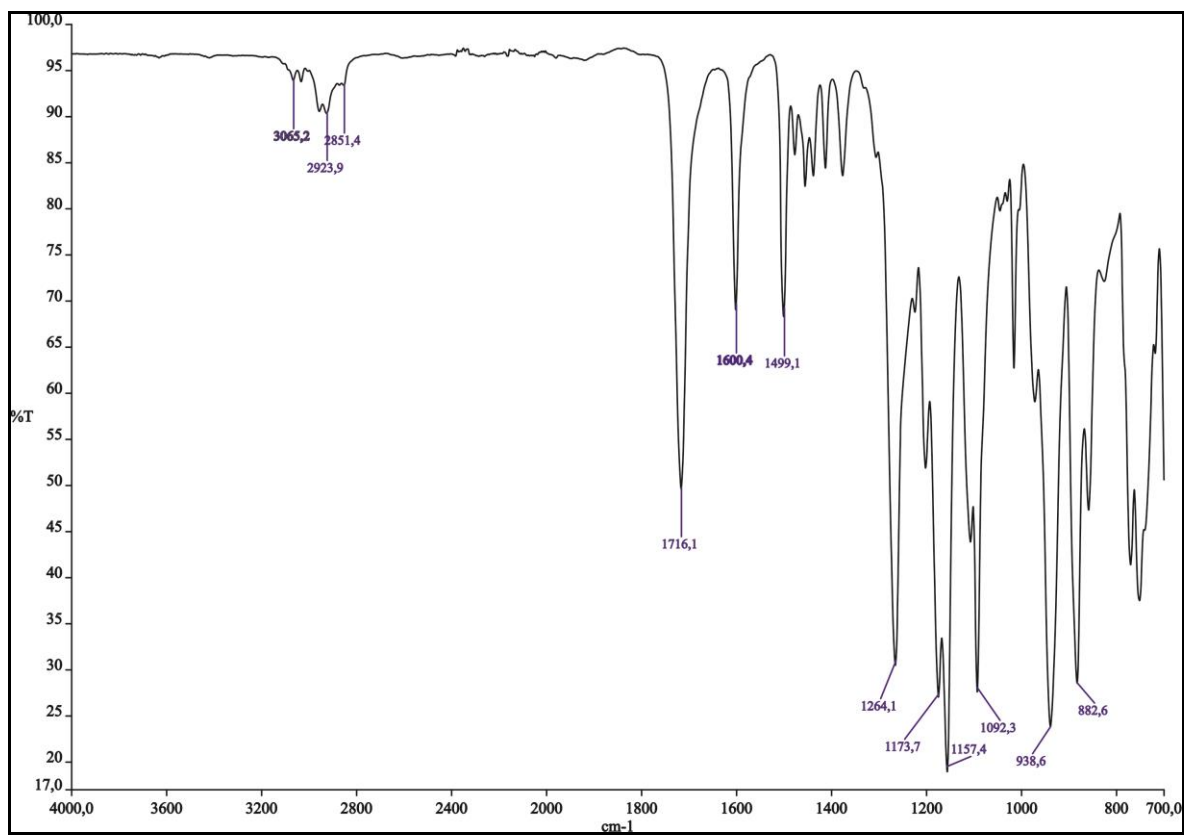

**Figure S30.** FT-IR spectrum of compound 6

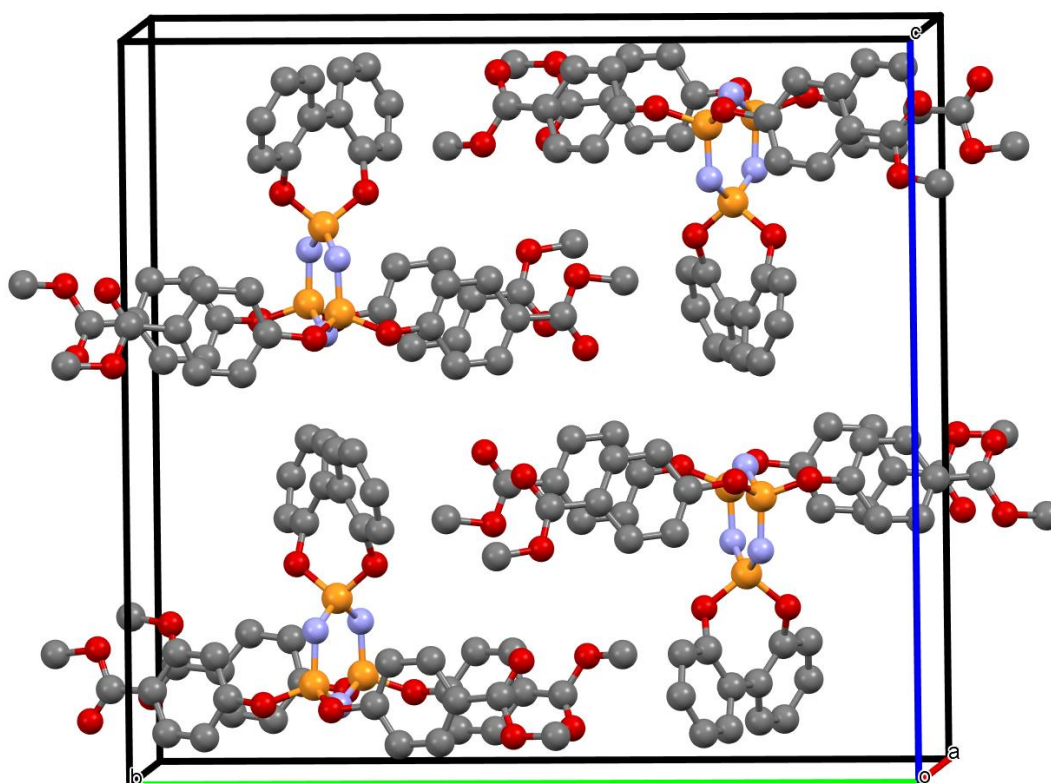

**Figure S31.** Perspective view of crystal packing of compound **2**

**Table S1.** The bond and conformational parameters for compounds **2**.

| <b>2</b>                |           |         |           |
|-------------------------|-----------|---------|-----------|
| <b>Bond Lengths (Å)</b> |           |         |           |
| P2—O3                   | 1.574 (2) | C24—C23 | 1.392 (5) |
| P2—O4                   | 1.579 (3) | C24—C25 | 1.381 (5) |
| P2—N2                   | 1.577 (3) | C21—C26 | 1.366 (5) |
| P2—N1                   | 1.572 (3) | C21—C22 | 1.373 (5) |
| P1—O2                   | 1.583 (2) | C29—C30 | 1.347 (6) |
| P1—O1                   | 1.578 (2) | C29—C34 | 1.360 (6) |
| P1—N3                   | 1.577 (3) | C11—C10 | 1.375 (6) |
| P1—N1                   | 1.571 (3) | C2—C3   | 1.381 (5) |
| P3—O5                   | 1.580 (2) | C18—C17 | 1.372 (5) |
| P3—O6                   | 1.576 (2) | C16—C19 | 1.478 (5) |
| P3—N3                   | 1.576 (3) | C16—C17 | 1.383 (5) |
| P3—N2                   | 1.576 (3) | C16—C15 | 1.390 (6) |
| O2—C1                   | 1.404 (4) | C40—C39 | 1.374 (6) |
| O5—C13                  | 1.396 (4) | C40—C43 | 1.480 (6) |
| O1—C12                  | 1.412 (4) | C40—C41 | 1.385 (6) |
| O3—C21                  | 1.402 (4) | O12—C43 | 1.307 (6) |
| O4—C37                  | 1.402 (4) | O12—C44 | 1.430 (6) |
| O6—C29                  | 1.397 (4) | C23—C22 | 1.380 (5) |
| O9—C27                  | 1.324 (5) | C5—C4   | 1.366 (6) |

|                        |             |             |           |
|------------------------|-------------|-------------|-----------|
| O9—C28                 | 1.441 (5)   | C25—C26     | 1.371 (5) |
| O8—C19                 | 1.323 (5)   | C8—C9       | 1.366 (6) |
| O8—C20                 | 1.438 (5)   | C38—C39     | 1.376 (6) |
| O10—C27                | 1.194 (5)   | C4—C3       | 1.362 (6) |
| O7—C19                 | 1.198 (5)   | C9—C10      | 1.385 (6) |
| C37—C38                | 1.370 (5)   | C15—C14     | 1.369 (6) |
| C37—C42                | 1.362 (5)   | C42—C41     | 1.369 (6) |
| C7—C6                  | 1.476 (5)   | O11—C43     | 1.175 (6) |
| C7—C12                 | 1.386 (5)   | C30—C31     | 1.371 (6) |
| C7—C8                  | 1.404 (5)   | C34—C33     | 1.378 (7) |
| C1—C6                  | 1.388 (5)   | C32—C31     | 1.358 (7) |
| C1—C2                  | 1.380 (5)   | C32—C33     | 1.368 (8) |
| C13—C18                | 1.364 (5)   | C32—C35     | 1.472 (8) |
| C13—C14                | 1.377 (5)   | O13—C35     | 1.173 (9) |
| C6—C5                  | 1.399 (5)   | O14—C35     | 1.248 (9) |
| C12—C11                | 1.378 (5)   | O14—C36     | 1.464 (7) |
| C24—C27                | 1.483 (5)   |             |           |
| <b>Bond Angles (°)</b> |             |             |           |
| O3—P2—O4               | 92.77 (13)  | C22—C21—O3  | 119.3 (3) |
| O3—P2—N2               | 111.11 (15) | C30—C29—O6  | 123.1 (3) |
| N2—P2—O4               | 111.11 (15) | C30—C29—C34 | 120.6 (4) |
| N1—P2—O3               | 111.46 (14) | C34—C29—O6  | 116.1 (4) |
| N1—P2—O4               | 112.01 (15) | C10—C11—C12 | 119.2 (4) |
| N1—P2—N2               | 116.05 (15) | C1—C2—C3    | 119.3 (4) |
| O1—P1—O2               | 102.91 (12) | C13—C18—C17 | 120.1 (4) |
| N3—P1—O2               | 104.88 (13) | O9—C27—C24  | 112.9 (3) |
| N3—P1—O1               | 111.76 (15) | O10—C27—O9  | 122.5 (4) |
| N1—P1—O2               | 112.13 (15) | O10—C27—C24 | 124.6 (4) |
| N1—P1—O1               | 105.75 (14) | C17—C16—C19 | 122.0 (4) |
| N1—P1—N3               | 118.42 (15) | C17—C16—C15 | 118.4 (4) |
| O6—P3—O5               | 93.05 (13)  | C15—C16—C19 | 119.5 (4) |
| O6—P3—N2               | 110.88 (15) | C39—C40—C43 | 122.2 (4) |
| N3—P3—O5               | 111.38 (15) | C39—C40—C41 | 118.6 (4) |
| N3—P3—O6               | 112.07 (14) | C41—C40—C43 | 119.2 (4) |
| N3—P3—N2               | 116.01 (15) | C43—O12—C44 | 117.9 (5) |
| N2—P3—O5               | 111.19 (15) | C22—C23—C24 | 120.5 (4) |
| C1—O2—P1               | 122.8 (2)   | C4—C5—C6    | 122.1 (4) |
| C13—O5—P3              | 126.5 (2)   | C26—C25—C24 | 120.6 (3) |
| C12—O1—P1              | 123.1 (2)   | C21—C26—C25 | 119.5 (3) |
| C21—O3—P2              | 123.4 (2)   | C9—C8—C7    | 121.7 (4) |
| C37—O4—P2              | 125.5 (2)   | C37—C38—C39 | 118.5 (4) |
| C29—O6—P3              | 125.3 (2)   | O8—C19—C16  | 112.2 (4) |
| P3—N3—P1               | 122.23 (18) | O7—C19—O8   | 123.7 (4) |
| P3—N2—P2               | 124.66 (18) | O7—C19—C16  | 124.0 (4) |
| C27—O9—C28             | 115.7 (3)   | C21—C22—C23 | 118.7 (3) |
| P1—N1—P2               | 122.49 (17) | C18—C17—C16 | 120.4 (4) |
| C19—O8—C20             | 116.2 (4)   | C3—C4—C5    | 120.3 (3) |
| C38—C37—O4             | 120.0 (3)   | C4—C3—C2    | 120.0 (4) |
| C42—C37—O4             | 117.8 (3)   | C8—C9—C10   | 120.1 (4) |

|             |           |             |           |
|-------------|-----------|-------------|-----------|
| C42—C37—C38 | 121.7 (3) | C14—C15—C16 | 121.3 (4) |
| C12—C7—C6   | 123.5 (3) | C37—C42—C41 | 119.1 (4) |
| C12—C7—C8   | 116.3 (3) | C15—C14—C13 | 118.9 (4) |
| C8—C7—C6    | 120.2 (3) | C40—C39—C38 | 121.2 (4) |
| C6—C1—O2    | 119.4 (3) | C11—C10—C9  | 119.9 (4) |
| C2—C1—O2    | 118.1 (3) | O12—C43—C40 | 113.2 (4) |
| C2—C1—C6    | 122.2 (3) | O11—C43—C40 | 123.3 (5) |
| C18—C13—O5  | 117.6 (3) | O11—C43—O12 | 123.1 (5) |
| C18—C13—C14 | 120.9 (3) | C42—C41—C40 | 120.8 (4) |
| C14—C13—O5  | 121.1 (3) | C29—C30—C31 | 119.8 (4) |
| C1—C6—C7    | 122.7 (3) | C29—C34—C33 | 119.0 (5) |
| C1—C6—C5    | 116.1 (3) | C31—C32—C33 | 118.2 (4) |
| C5—C6—C7    | 121.2 (3) | C31—C32—C35 | 124.3 (6) |
| C7—C12—O1   | 119.7 (3) | C33—C32—C35 | 117.5 (6) |
| C11—C12—O1  | 117.4 (3) | C35—O14—C36 | 106.9 (7) |
| C11—C12—C7  | 122.7 (3) | C32—C31—C30 | 121.2 (5) |
| C23—C24—C27 | 122.9 (3) | C32—C33—C34 | 121.1 (5) |
| C25—C24—C27 | 118.1 (3) | O13—C35—C32 | 126.6 (8) |
| C25—C24—C23 | 119.0 (3) | O13—C35—O14 | 119.2 (6) |
| C26—C21—O3  | 118.8 (3) | O14—C35—C32 | 114.2 (8) |
| C26—C21—C22 | 121.7 (3) |             |           |

**Table S2.** Predicted Log IC<sub>50</sub> (μM) and calculated Log IC<sub>50</sub> (μM) value of Compounds **1-6** for MCF-7 and DLD-1 cell lines

| MCF-7 cell line | Experimental Doses | Predicted Log IC <sub>50</sub> (μM) | Calculated IC <sub>50</sub> value | Observed Log IC <sub>50</sub> (μM) | Residual Error |
|-----------------|--------------------|-------------------------------------|-----------------------------------|------------------------------------|----------------|
| Compound 1      | 50                 | 4.301                               | 173.660                           | 3.760                              | -0.678         |
| Compound 2      | 12.5               | 4.903                               | 79.692                            | 4.099                              | -1.016         |
| Compound 3      | 25                 | 4.602                               | 93.469                            | 4.029                              | -0.769         |
| Compound 4      | 200                | 3.699                               | 173.062                           | 3.762                              | -0.075         |
| Compound 5      | 50                 | 4.301                               | 76.137                            | 4.118                              | -0.399         |
| Compound 6      | 25                 | 4.602                               | 72.238                            | 4.141                              | -0.682         |

| DLD-1 cell line | Experimental Doses | Predicted Log IC <sub>50</sub> (μM) | Calculated IC <sub>50</sub> value | Observed Log IC <sub>50</sub> (μM) | Residual Error |
|-----------------|--------------------|-------------------------------------|-----------------------------------|------------------------------------|----------------|
| Compound 1      | 25                 | 4.602                               | 14.712                            | 4.832                              | -0.143         |
| Compound 2      | 25                 | 4.602                               | 107.328                           | 3.969                              | -0.816         |
| Compound 3      | 25                 | 4.602                               | 54.320                            | 4.265                              | -0.585         |
| Compound 4      | 200                | 3.699                               | 157.244                           | 3.803                              | -0.042         |
| Compound 5      | 25                 | 4.602                               | 67.192                            | 4.173                              | -0.657         |
| Compound 6      | 12.5               | 4.903                               | 36.087                            | 4.443                              | -0.748         |
